# Supplementary material
Source: ML conference proceedings conference paper supplement (https://proceedings.neurips.cc/paper_files/paper/2011/hash/9b8619251a19057cff70779273e95aa6-Abstract.html)
Supplement: Supplementary file [file 9b8619251a19057cff70779273e95aa6-Supplemental.zip]

---

# Supplementary Material

## A Global Structural EM Algorithm for a Model of Cancer Progression

---

### 1 The derivation

A Hidden-variable Oncogenetic Tree (HOT) is a rooted binary tree in which we associate two binary stochastic variables,  $Z(u)$  and  $X(u)$ , with each vertex  $u$ . The vector  $Z$  represents the hidden variables and  $X$  the visible ones. Let  $\mathcal{T}$  be a HOT and let  $r$  be the root of  $\mathcal{T}$ . For the root, we set  $\Pr[Z(r) = 1] = 1$  and  $\Pr[X(r) = 1] = 1$ . For a non-root vertex  $u$ , the probability that  $Z(u) = 1$  will depend on  $Z(p(u))$ , i.e., we have two conditional probability distributions associated with the edge  $(p(u), u)$ , namely

$$\Pr[Z(u)|Z(p(u)) = 0], \quad \text{and} \\ \Pr[Z(u)|Z(p(u)) = 1].$$

As for the visible variables, two conditional probability distributions are associated with each:

$$\Pr[X(u)|Z(u) = 0], \quad \text{and} \\ \Pr[X(u)|Z(u) = 1].$$

The standard derivation of the EM-algorithm works for our HOTs as long as  $\Pr[Z, X|\mathcal{T}]$  is non-zero for all  $Z$ s and  $X$ s. Practically, when implementing the EM-algorithm, we ensure that all of the parameters of a HOT  $\mathcal{T}$ , i.e., the conditional probabilities associated with the vertices of  $\mathcal{T}$ , are non-zero by applying a lower bound on the parameters. In other words, after each iteration of the EM-algorithm, which results in a new HOT with higher likelihood, the parameters of the HOT are adjusted to ensure that every probability is at least as large as the lower bound.

To derive the EM-algorithm, we need to be able to maximize the so-called  $Q$ -term, i.e., given a set  $D$  of observations of the visible variables and a HOT, we need to be able to find the HOT  $\mathcal{T}'$  that maximizes

$$\begin{aligned}
Q(\mathcal{T}'; \mathcal{T}) &= \sum_{X \in D} \sum_Z \Pr[Z|X, \mathcal{T}] \log(\Pr[Z, X|\mathcal{T}']) \\
&= \sum_{X \in D} \sum_Z \Pr[Z|X, \mathcal{T}] \log(\Pr[Z|\mathcal{T}'] \Pr[X|Z, \mathcal{T}']) \\
&= \sum_{X \in D} \sum_Z \Pr[Z|X, \mathcal{T}] \log\left(\prod_{(u,v) \in \mathcal{T}'} \Pr[Z(v)|Z(u), \mathcal{T}'] \Pr[X(v)|Z(v), \mathcal{T}']\right) \\
&= \sum_{X \in D} \sum_Z \Pr[Z|X, \mathcal{T}] \sum_{(u,v) \in \mathcal{T}'} \left(\log(\Pr[Z(v)|Z(u), \mathcal{T}']) + \log(\Pr[X(v)|Z(v), \mathcal{T}'])\right) \\
&= \sum_{(u,v) \in \mathcal{T}'} \left( \sum_{X \in D} \sum_Z \Pr[Z|X, \mathcal{T}] \log(\Pr[Z(v)|Z(u), \mathcal{T}']) + \sum_{X \in D} \sum_Z \Pr[Z|X, \mathcal{T}] \log(\Pr[X(v)|Z(v), \mathcal{T}']) \right) \\
&= \sum_{(u,v) \in \mathcal{T}'} \left( \sum_{X \in D} \sum_{a,b \in \{0,1\}} \log(\Pr[Z(v) = b|Z(u) = a, \mathcal{T}']) \sum_{\substack{Z: Z(u)=a, \\ Z(v)=b}} \Pr[Z|X, \mathcal{T}] \right. \\
&\quad \left. + \sum_{\sigma, a \in \{0,1\}} \log(\Pr[X(v) = \sigma|Z(v) = a, \mathcal{T}']) \sum_{\substack{X \in D: \\ X(v)=\sigma}} \sum_{Z: Z(v)=a} \Pr[Z|X, \mathcal{T}] \right) \\
&= \sum_{(u,v) \in \mathcal{T}'} \left( \sum_{a,b \in \{0,1\}} \sum_{X \in D} \log(\Pr[Z(v) = b|Z(u) = a, \mathcal{T}']) \Pr[Z(u) = a, Z(v) = b|X, \mathcal{T}] \right. \\
&\quad \left. + \sum_{\sigma, a \in \{0,1\}} \sum_{\substack{X \in D: \\ X(v)=\sigma}} \log(\Pr[X(v) = \sigma|Z(v) = a, \mathcal{T}']) \Pr[Z(v) = a|X, \mathcal{T}] \right) \\
&= \sum_{(u,v) \in \mathcal{T}'} \left( \sum_{a,b \in \{0,1\}} \log(\Pr[Z(v) = b|Z(u) = a, \mathcal{T}']) \sum_{X \in D} \Pr[Z(u) = a, Z(v) = b|X, \mathcal{T}] \right. \\
&\quad \left. + \sum_{\sigma, a \in \{0,1\}} \log(\Pr[X(v) = \sigma|Z(v) = a, \mathcal{T}']) \sum_{\substack{X \in D: \\ X(v)=\sigma}} \Pr[Z(v) = a|X, \mathcal{T}] \right) \\
&= \sum_{(u,v) \in \mathcal{T}'} \left( \sum_{a,b \in \{0,1\}} \log(\Pr[Z(v) = b|Z(u) = a, \mathcal{T}']) A_{(u,v)}(a, b) \right. \\
&\quad \left. + \sum_{\sigma, a \in \{0,1\}} \log(\Pr[X(v) = \sigma|Z(v) = a, \mathcal{T}']) B_v(\sigma, a) \right),
\end{aligned}$$

where

$$\begin{aligned}
A_{(u,v)}(a, b) &= \sum_{X \in D} \Pr[Z(u) = a, Z(v) = b|X, \mathcal{T}], \quad \text{and} \\
B_v(\sigma, a) &= \sum_{\substack{X \in D: \\ X(v)=\sigma}} \Pr[Z(v) = a|X, \mathcal{T}].
\end{aligned}$$

Maximizing the  $Q$ -term is now seen to be standard procedure. Given  $\mathcal{T}$ , we are able to compute  $A_{(u,v)}(a, b)$  for  $a, b \in \{0, 1\}$ , and for any edge  $(u, v) \in \mathcal{T}'$  the parameters are optimized by setting

$$\Pr[Z(v) = a | Z(u) = b] = \frac{A_{(u,v)}(a, b)}{A_{(u,v)}(a, b) + A_{(u,v)}(1 - a, b)}.$$

Furthermore, it is clear that the optimal parameters associated with an edge is independant of any other edges present in  $\mathcal{T}'$ . Therefore, we can find the optimum paramters for each possible edge and find the tree that maximizes the  $Q$ -term.

Also, note that associating a weight  $f(X)$  with each datapoint  $X \in D$  causes us no difficulties in optimizing the  $Q$ -term. The only difference is we would have to add the factor  $f(x)$  to each term of the definition of  $A_{(u,v)}(a, b)$  and  $B_v(\sigma, a)$ .

## 2 Experiments

The following figures show some of the detailed results of our experimental analysis.

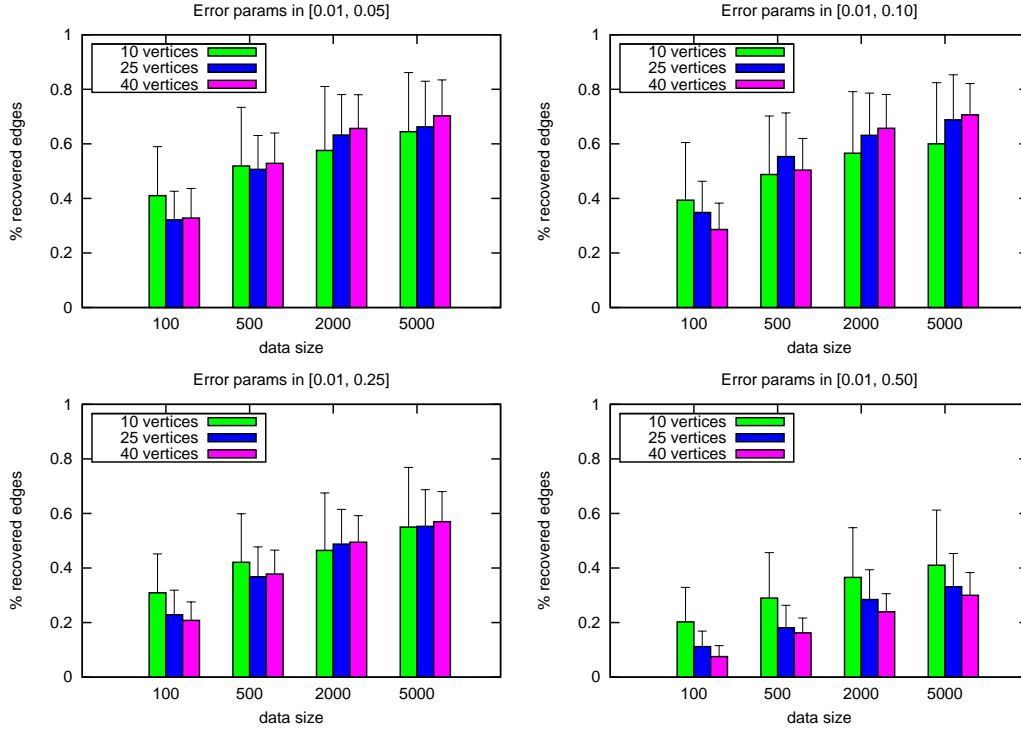

Figure 1: Histograms showing proportion of edges correctly recovered by the EM algorithm with free parameters on synthetic data. Error bars show one standard deviation.

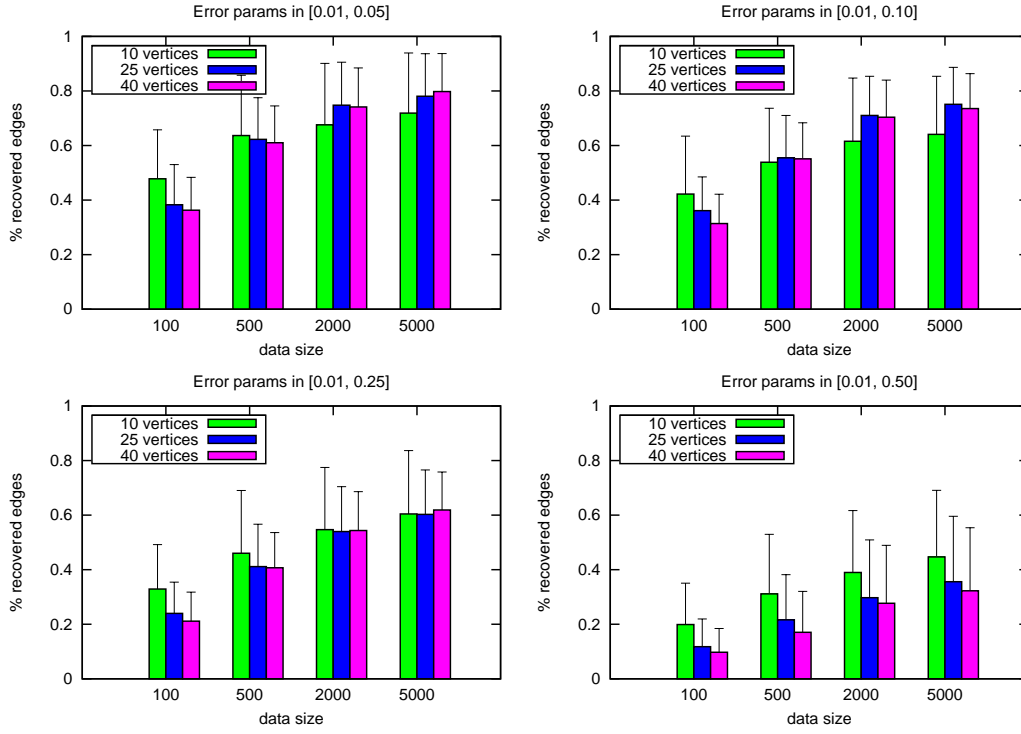

Figure 2: Histograms showing proportion of edges correctly recovered by the EM algorithm with global parameters on synthetic data. Error bars show one standard deviation.

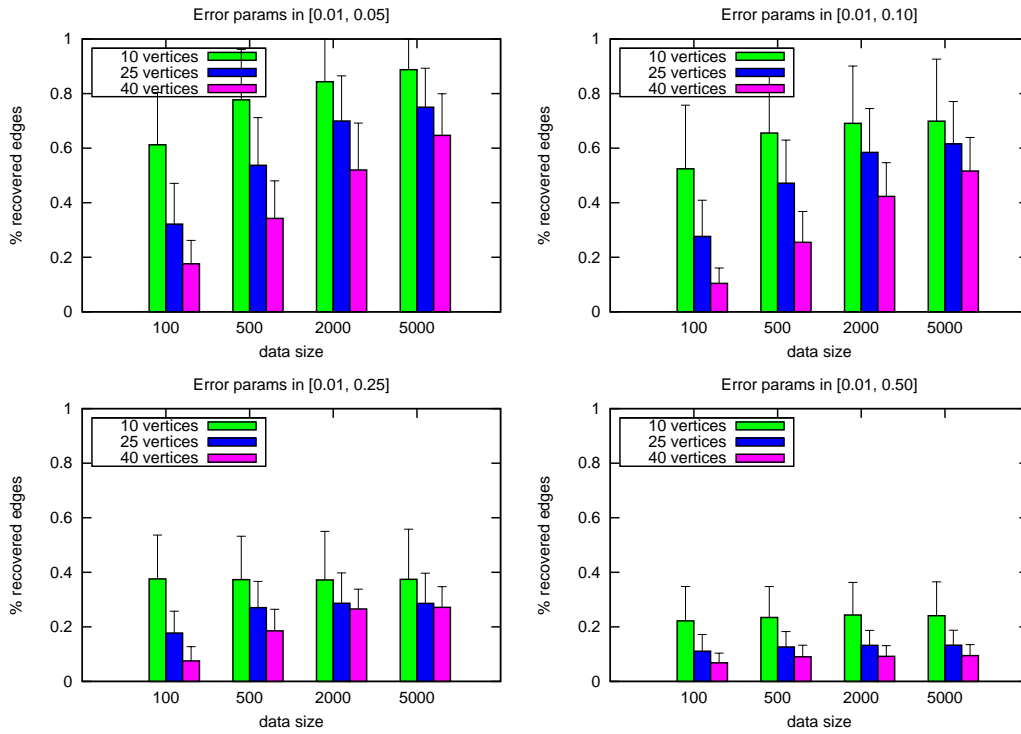

Figure 3: Histograms showing proportion of edges correctly recovered by Mtreemix on the same synthetic data as in Figure 1. Error bars show one standard deviation.

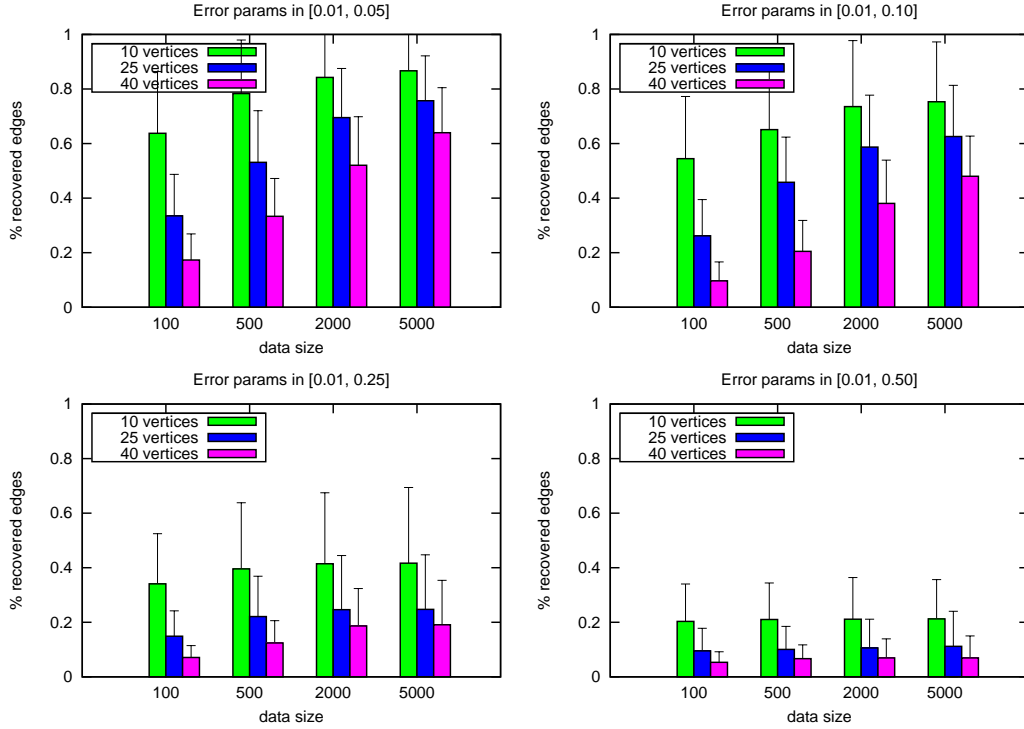

Figure 4: Histograms showing proportion of edges correctly recovered by Mtreemix on the same synthetic data as in Figure 2. Error bars show one standard deviation.

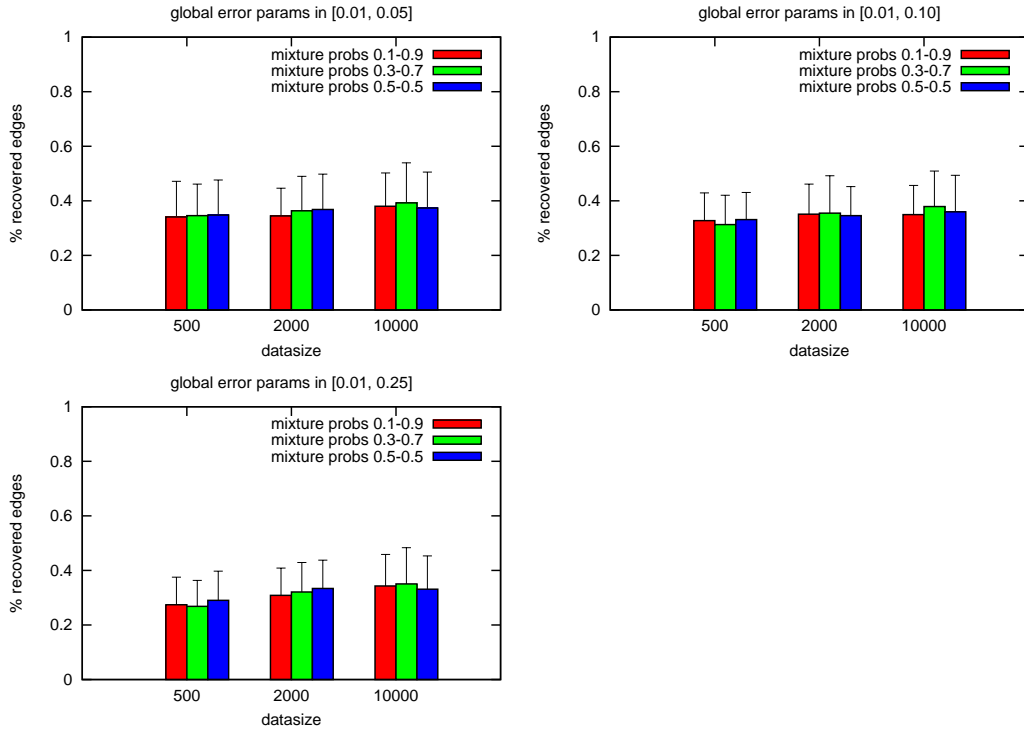

Figure 5: Histograms showing proportion of edges correctly recovered by the EM algorithm for HOT-mixtures with global parameters on two HOTs with 10 vertices each. Each bar represents 100 mixtures. Error bars show one standard deviation.

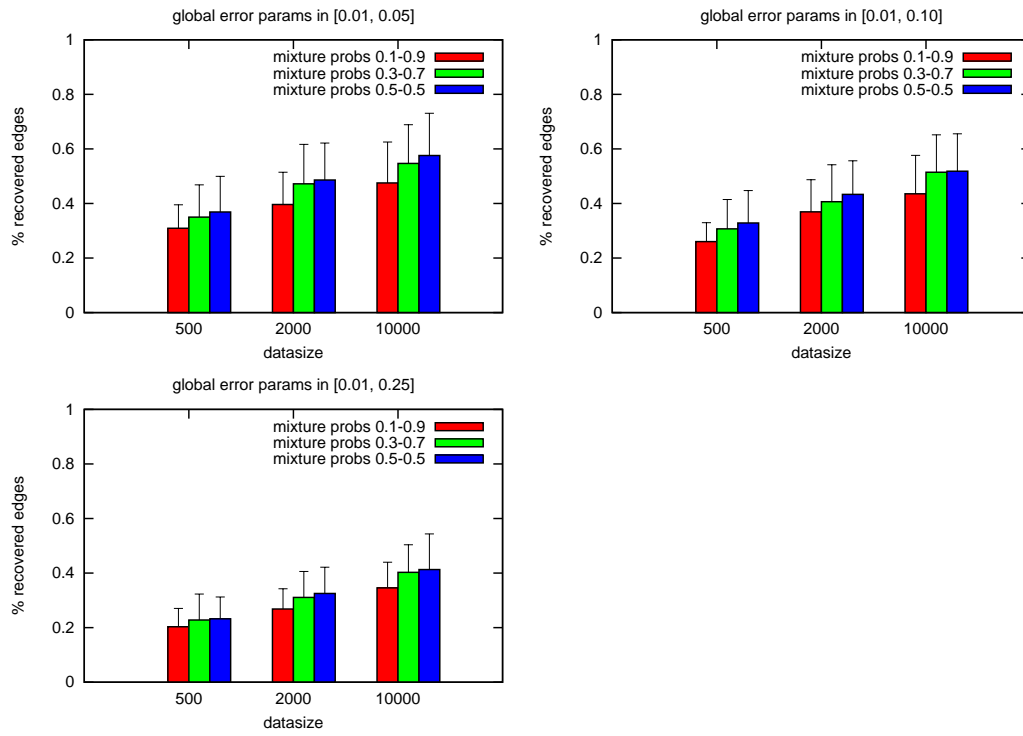

Figure 6: Histograms showing proportion of edges correctly recovered by the EM algorithm for HOT-mixtures with global parameters on two HOTs with 25 vertices each. Each bar represents 100 mixtures. Error bars show one standard deviation.
